# Supplementary material
Source: PubMed Central journal article supplement (PMC10353836)
Supplement: NIHMS1914404-supplement-Supplementary_material.pdf [file NIHMS1914404-supplement-Supplementary_material.pdf]

## **SUPPLEMENTARY MATERIAL**

### **Engineering adenylate cyclase activated by near-infrared window light for mammalian optogenetic applications**

Anastasia Fomicheva, Chen Zhou, Qian-Quan Sun, and Mark Gomelsky

**Supplementary Table 1. Bacterial strains and plasmids used in this study.**

| Strain or plasmid           | Description                                                                                                                                                                                          | Reference or source |
|-----------------------------|------------------------------------------------------------------------------------------------------------------------------------------------------------------------------------------------------|---------------------|
| <i>Escherichia coli</i>     |                                                                                                                                                                                                      |                     |
| DH5 $\alpha$                | Strain for cloning and plasmid maintenance                                                                                                                                                           | NEB                 |
| BL21 [DE3]                  | Strain for protein overexpression                                                                                                                                                                    | NEB                 |
| BL21 [DE3] <i>cya</i>       | Strain for AC assays                                                                                                                                                                                 | [12]                |
| <b>Plasmids</b>             |                                                                                                                                                                                                      |                     |
| pET23a                      | Protein overexpression plasmid, $P_{T7}$ , His <sub>6</sub> -tag, Ap <sup>R</sup>                                                                                                                    | Novagen             |
| pET23::ilaC22_k27_Y259F     | Plasmid for IlaC* overexpression, Ap <sup>R</sup>                                                                                                                                                    | [12]                |
| pET23::ilaD#                | Plasmid for IlaD# overexpression, Ap <sup>R</sup>                                                                                                                                                    | This study          |
| pET23::ilaM#                | Plasmid for IlaM# overexpression, Ap <sup>R</sup>                                                                                                                                                    | This study          |
| pT7-ho1                     | Plasmid for expression of heme oxygenase <i>ho1</i>                                                                                                                                                  | [10]                |
| pAAV-hSyn-hChR2(H134R)-EYFP | AAV vector for expression of humanized ChR2 with H134R mutation fused to EYFP driven by $P_{hSyn}$                                                                                                   | Addgene #26973      |
| pAAV::ilaM5                 | AAV vector expressing IlaM5-p2A-BphO-p2A-eGFP under the hSyn promoter                                                                                                                                | This study          |
| pAAV::ilaC*                 | AAV vector expressing IlaC*-p2A-BphO-p2A-eGFP under the hSyn promoter                                                                                                                                | This study          |
| pCAG-GFP                    | Mammalian vector expressing eGFP under the CAG promoter                                                                                                                                              | Addgene #11150      |
| pCRE-MetLuc2                | Mammalian cAMP reporter vector containing two copies of the cAMP-response element (CRE) fused to the TATA-like promoter controlling expression of the secreted <i>Metridia longa</i> luciferase gene | Clontech #631745    |

**Supplementary Figure 1. Alignments of the (a) PSM and (b) AC modules used for NIRW-AC engineering. (a)** Alignment of the PSM modules from *R. sphaeroides* BphG1 (aa 1-509) and *D. radiodurans* BphP (1-507). **(b)** Alignment of the catalytic AC domains from *Nostoc* sp. CyaB1 (aa 596-781) and *M. tuberculosis* RV1264 (aa 211-375). Identical residues are shown on the black background; similar residues on the grey background.

**a**

```

BphG1 MARG-----CLMTISGGTFDPSICEMEPIATPGAIQPHGALMTARADSGR 45
BphP  MSRDPLPFFFPPLYLGGPEITTENCEREPIHIPGSIQPHGALLTADGHSGE 50

BphG1 VAHASVNLGEILGLPAASVIGAPIGEVIGRVNEILLREARRSGS-ETPET 94
BphP  VLQMSLNAAATFLGQEPTVLRGQTLAALLPEQWPALQA-ALPPGCPDALQY 99

BphG1 IGSFRRSDGQLHLHAFQSGDYMCLDIEPVRDEDGRLPPGARQSVIETFS 144
BphP  RATLDWPAAGHLSLTVHRVGELLILEFEPTEAWDSTGPHALRNAM-FALE 148

BphG1 SAMTQVEICELAVHGLQVIGYDRVMAYRFGADGHGEVIAERRRQDLEPY 194
BphP  SAPNLRALAEVATQTVRELTGFDRVMLYKFAPDATGEVIAEARREGLHAF 198

BphG1 LGLHYPASDIPQIARALYLRQRVGAIADACYRPVPLLGHPELDDGKPLDL 244
BphP  LGRHFPASDIPAQARALYTRHLLRLTADTRAAAVPLDPVLNPQTNAPTPL 248

BphG1 THSSLRSVSPVHLDYMQNMNTAASLTIGLADGDRLWGMLVCHNTTPRIAG 294
BphP  GGAVLRATSPMHMQYLRNMGVGSSLSVSVVVGGLWGLIACHHQTPYVLP 298

BphG1 PEWRAAAGMIGQVVSLLSRLGEVENAA--ETLARQSTLST--LVERLST 340
BphP  PDLRTTLEYLGRLLSLQVQVKEAADVAAFRQSLREHHARVALAAAHSLSP 348

BphG1 GDTLAAAFVAADQIILDLVGASAAVRLAGQELHFGRTPPVDAMQKVLDS 390
BphP  HDTLSD----PALDLLGLMRAGGLILRFEGRWQTLGEVPPAPAVDALLAW 394

BphG1 LGRPSPLEVLSIDDVTLRHPELPELLAGSGILLPLTSGDDLIAWFRP 440
BphP  LET-QPGALVQTDALGQLWPAGADLAPSAAGLLAISVGEGWSECLVWLRP 443

BphG1 EHVQTITWGGNPAEHGTWNPATQRMRPRASFDAWKETVTGRSLPWTSAER 490
BphP  ELRLEVAVGGATPDQ-----AKDDLGPRHSFDTYLEEKRGYAEPWHPGEI 488

BphG1 NCARELGEAIAAEMAQRTR 509
BphP  EEAQDLRDTLTGALGERLS 507

```

**b**

```

CyaB1 -ERKEVTVLFSDIRGYTTLTENLGAAEVVSLLNQYFETMVEAVFNYEGTL 49
RV1264 PGARQVTVAFADLVGFTQLGEVVSAEELGHLAGRLA-GLARDLTAPPVWF 49

CyaB1 DKFIGDALMAVFGAPLPLTENHAWQAVQSALDMRQRLQEFNQRRIQAQP 99
RV1264 IKTIGDAVMLVCPDPAPLLDTVLKLV--EVVDTD---N-----NFP 85

CyaB1 QIKIGIGISSGEVVSGNIGSHKRMDYTVIGDGVNLSSSRLETVTKEYGCDI 149
RV1264 RLRA--GVASGMAVSRA-----GDWFGSPVNVASRVTGVARPGA--V 123

CyaB1 IISESTYQL-----CCDRIWVRQLDRIRVKGKNQAVNIYEL- 185
RV1264 LVADSVREALGDAPEADGFQWSF-AGPRRLRGIRGDVRLFRVR 165

```

**Supplementary Figure 2. Photoactivated cAMP-dependent gene expression in *E. coli* expressing engineered ACs.** Shown are images of the  $\beta$ -galactosidase plate dilution assays indicative of cAMP levels. Dilutions of cultures of BL21[DE3] *cya* (pET::ila#; pT7-ho1) were spotted on LB agar containing Ap, Km, X-Gal and IPTG and grown at 28 °C or 37 °C either in the dark, or under red (660 nm) light. Two different irradiation regimens were used involving more frequent (0.5 min light/ 2 min dark) or less frequent (0.5 min light/ 30 min dark) light pulses. For growth in the dark, the plates were covered in aluminum foil. **(a)** Comparison of activities of IlaC\* and ACs of the IlaD series at 28 °C (25  $\mu$ M IPTG). **(b)** Comparison of activities of IlaC\* and ACs of the IlaM series at 28 °C and 37 °C (25  $\mu$ M IPTG). **(c)** Comparison of activities of IlaM4 and IlaM5 at 37 °C at lower expression levels (10  $\mu$ M IPTG).

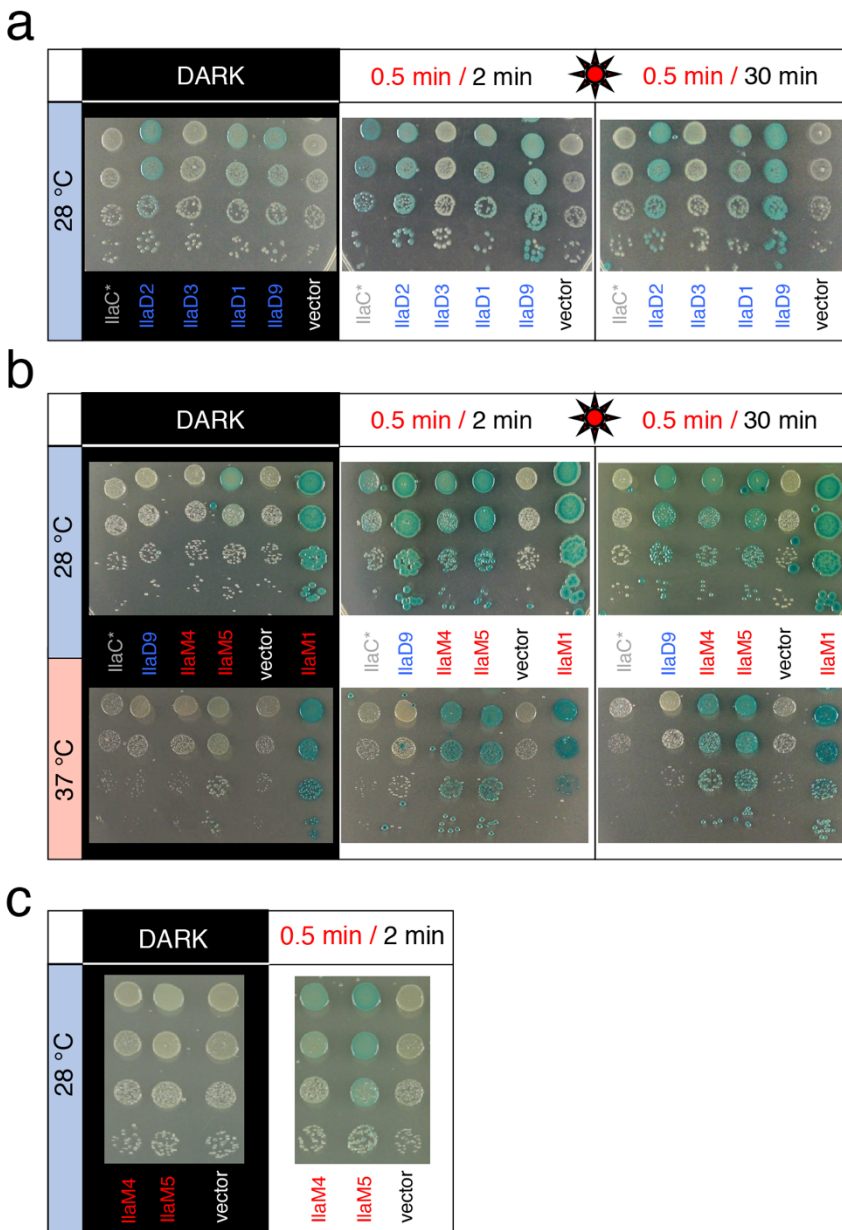

**Supplementary Figure 3. Photoactivated cAMP-dependent gene expression in HEK293 cells expressing IlaC\* or IlaM5.** (a) Evidence of a functional hSyn promoter in the HEK293 cells. eGFP expressed from the hSyn promoter in the HEK293 cells transfected with pAAV::IlaC\* and pCRE-MetLuc2 (left panel; Clontech [TaKaRa, Catalog No. 631745) or pAAV::IlaM5 and pCRE-MetLuc2 (right panel), 48 h post-transfection. The pAAV::IlaC\* and pAAV::IlaM5 constructs are shown in Fig. 5b. Fluorescent microscopy: excitation 488 nm, emission 540 nm. Scale bar, 160  $\mu$ m. (b) Measurements of secreted MetLuc expressed from the cAMP-dependent promoter (pCRE-MetLuc2) in the HEK293 cells expressing IlaC\* (pAAV::IlaC\*) or IlaM5 (pAAV::IlaM5). Twenty-four h post-transfection the cells were exposed to pulsed (1 min light/ 5 min dark) red (660-nm) light (red bars) or grown in the dark for the duration of 3 to 24 h. Grey bars, MetLuc levels in the cells transfected with a negative control plasmid, pCAG-GFP, and pCRE-MetLuc2 and grown in the dark. These measurements represent accumulation of MetLuc due to native ACs. Shown are mean data  $\pm$  SD from 3 independent experiments (2 technical replicates per experiment).

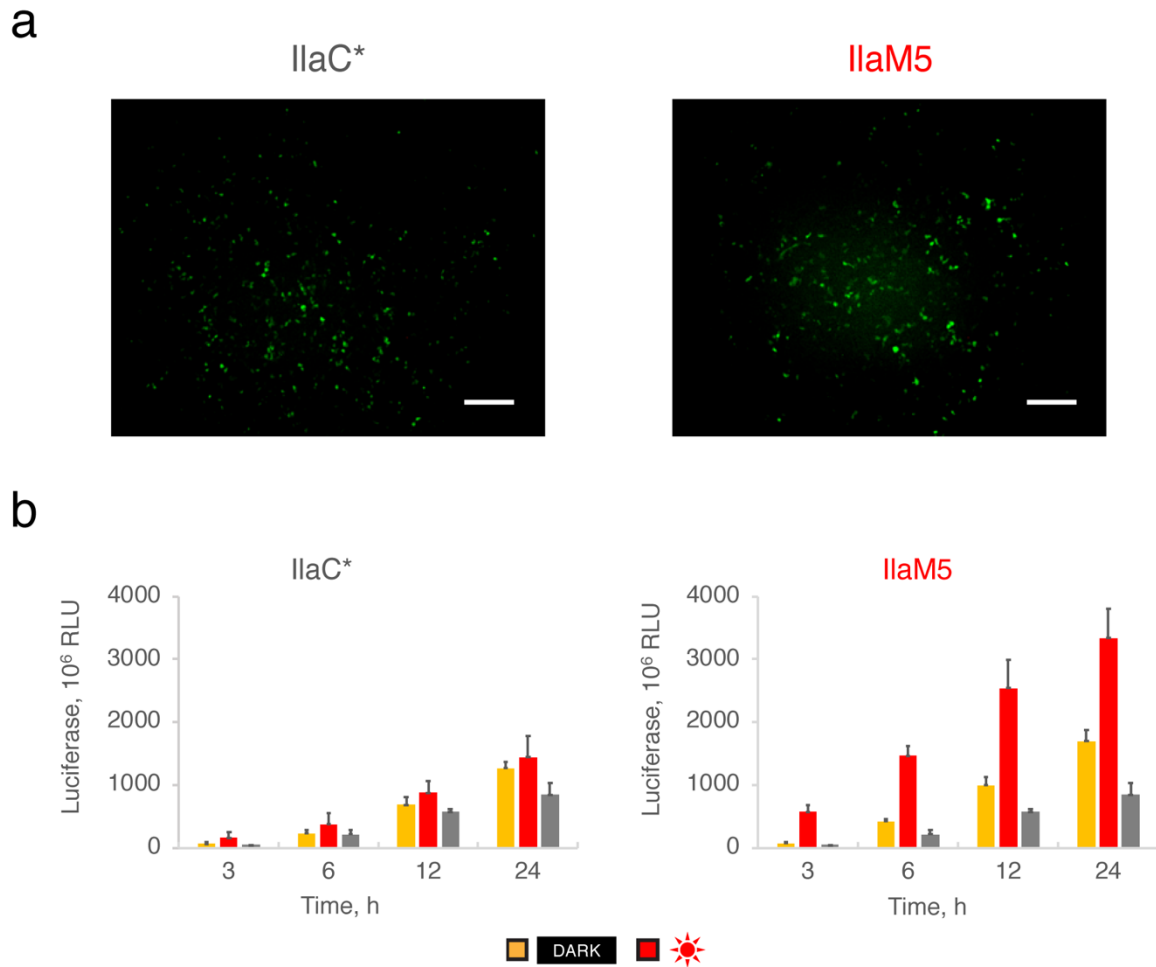

**Supplementary Figure 4. Photostimulation of HCN currents by IlaM5 in thalamic neuron slices.** Photomicrograph of thalamic slice in a pAAV::IlaM5 transfected mouse, showing robust eGFP expression from the hSyn promoter in thalamic relay neurons. Scale bar, 100  $\mu$ m.

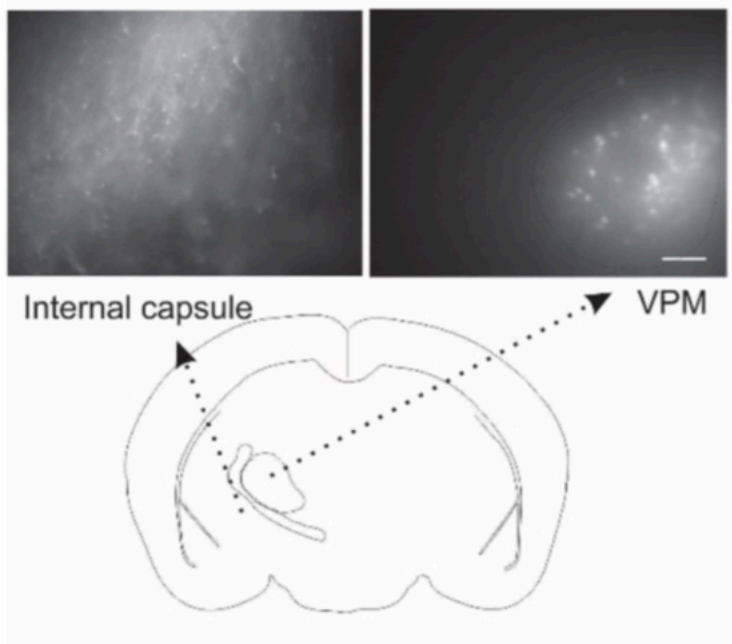

**Supplementary Figure 5. Noninvasive NIRW light stimulation and EEG recording arena.** (a) Photo of a mouse cage and a NIRW LED panel (300 W, nominal power) mounted approximately 30 cm above the cage floor. EEG recordings were taken via an electrode implanted into the mouse cortex or the thalamus region. White arrow points at a mouse. (b) Zoomed-in image of the cage shown in panel (a).

**a**

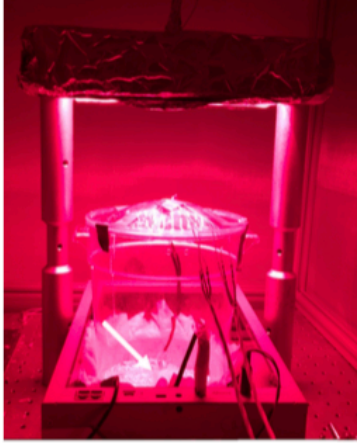

**b**

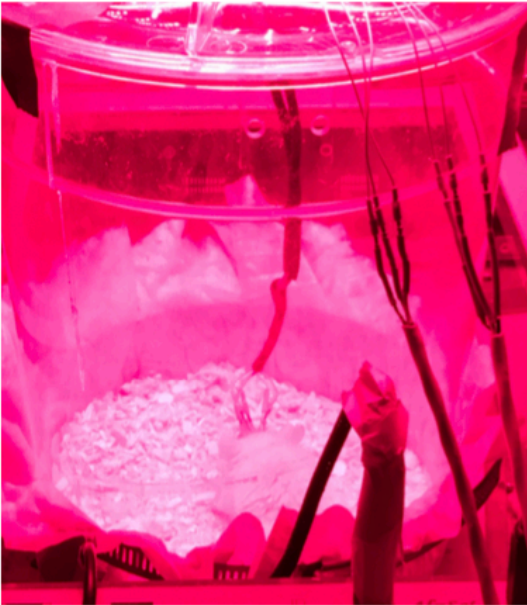

**Supplementary Figure 6. Protein sequences of the engineered NIRW-ACs, IlaD9 and IlaM5.** The sequence derived from BphP is shown in red; the sequence derived from CyaB1 is shown in light-blue; the sequence derived from Rv1264 is shown in navy-blue; the added residues to the  $\alpha$ -helical linker are shown in green; the C-terminal His<sub>6</sub>-tag is shown in black.

### IlaD9

MSRDPLPFFPPLYLGGPEITTENCEREPIHIPGSIQPHGALLTADGHSGEVLQMSLNAATFLGQE  
PTVLRGQTLAALLPEQWPALQAALPPGCPDALQYRATLDWPAAGHLSLTVHRVGELLILEFEPT  
EAWDSTGPHALRNAMFALESAPNLRALAEVATQTVRELTGFDRVMPLYKFAPDATGEVIAEARR  
EGLHAFLGHRFPASDIPAQARALYTRHLLRLTADTRAAAVPLDPVLNPQTNAPTPLGGAVLRAT  
SPMHMQYLRNMGVGSLSVSVVGGQLWGLIACHHQTPYVLPDLRRTTLEYLGRLLSLQVQV  
KEAADVAEFRQSLREHHARVALAAAHSLSPHDTLSDPALDLLGLMRAGGLILRFEGRWQTLGE  
VPPAPAVDALLAWLETQPGALVQTDALGQLWPAGADLAPSAAGLLAISVGEGWSECLVWLRP  
ELRLEVAWGGATPDQAKDDLGP RHSFDTYLEEKRGYAEPWHPGEIEEAQDLRDTLTGALGER  
LRAELERKEVTVLFSDIRGYTTLTENLGAAEVVSLLNQYFETMVEAVFNIEGTLDFIGDALMAV  
FGAPLPLTENHAWQAVRSALDMRQRLKEFNQRRIIQAQPQIKIGISSGEVVSNGNIGSHKRM  
YTVIGDGVNLSSRLETVTKEYGCDIILSEFTYQLCSDRIRVRQLDKIRVKGKHQAVNIYELISDRS  
TPLDDNTQEFLFHYHNGRTAYLVRDFTQAIACFN SAKHIRPTDQAVNIHLERAYNYQQTPPPPQ  
WDGVWTIFTKHHHHHH

### IlaM5

MSRDPLPFFPPLYLGGPEITTENCEREPIHIPGSIQPHGALLTADGHSGEVLQMSLNAATFLGQE  
PTVLRGQTLAALLPEQWPALQAALPPGCPDALQYRATLDWPAAGHLSLTVHRVGELLILEFEPT  
EAWDSTGPHALRNAMFALESAPNLRALAEVATQTVRELTGFDRVMPLYKFAPDATGEVIAEARR  
EGLHAFLGHRFPASDIPAQARALYTRHLLRLTADTRAAAVPLDPVLNPQTNAPTPLGGAVLRAT  
SPMHMQYLRNMGVGSLSVSVVGGQLWGLIACHHQTPYVLPDLRRTTLEYLGRLLSLQVQV  
KEAADVAEFRQSLREHHARVALAAAHSLSPHDTLSDPALDLLGLMRAGGLILRFEGRWQTLGE  
VPPAPAVDALLAWLETQPGALVQTDALGQLWPAGADLAPSAAGLLAISVGEGWSECLVWLRP  
ELRLEVAWGGATPDQAKDDLGP RHSFDTYLEEKRGYAEPWHPGEIEEAQDLRDTLTGALGER  
LRAELERKEVTVAFADLVGFTQLGEVVS AEELGHLAGRLAGLARDLTAPPVWFIKTIGDAVML  
VCPDPAPLLDTVLKLEVVDTDNNFPRLRAGVASGMAVSRAGDWFGSPVNVASRV TGVARPG  
AVLVADSVREALGDAPEADGFQWSFAGPRRLRGIRGDVRLFRVRRGATRTGSGGAAQDDDL  
AGSSPHHHHHH
